# Supplementary material for: Akt phosphorylation on Thr308 but not on Ser473 correlates with Akt protein kinase activity in human non-small cell lung cancer
Source: PubMed Central journal article supplement (PMC3111153; doi:10.1038/bjc.2011.132), 2011-04-19

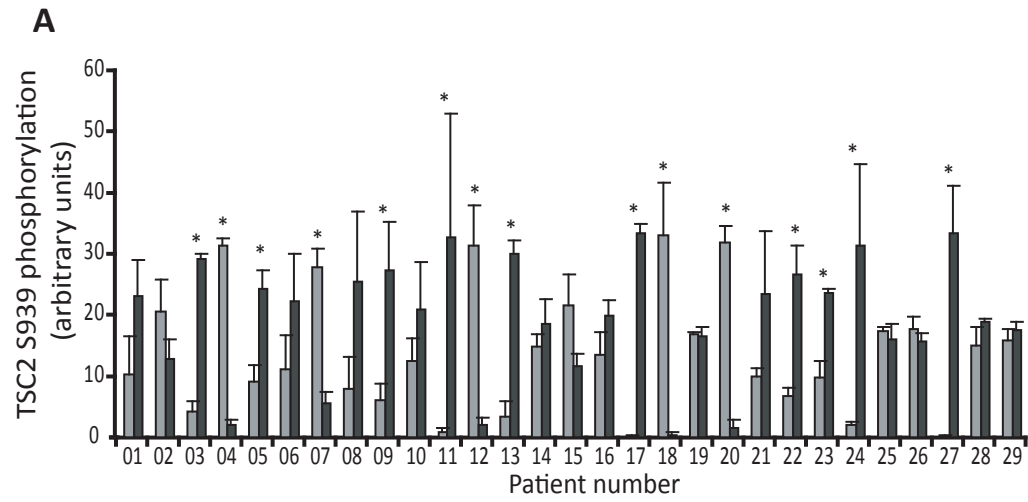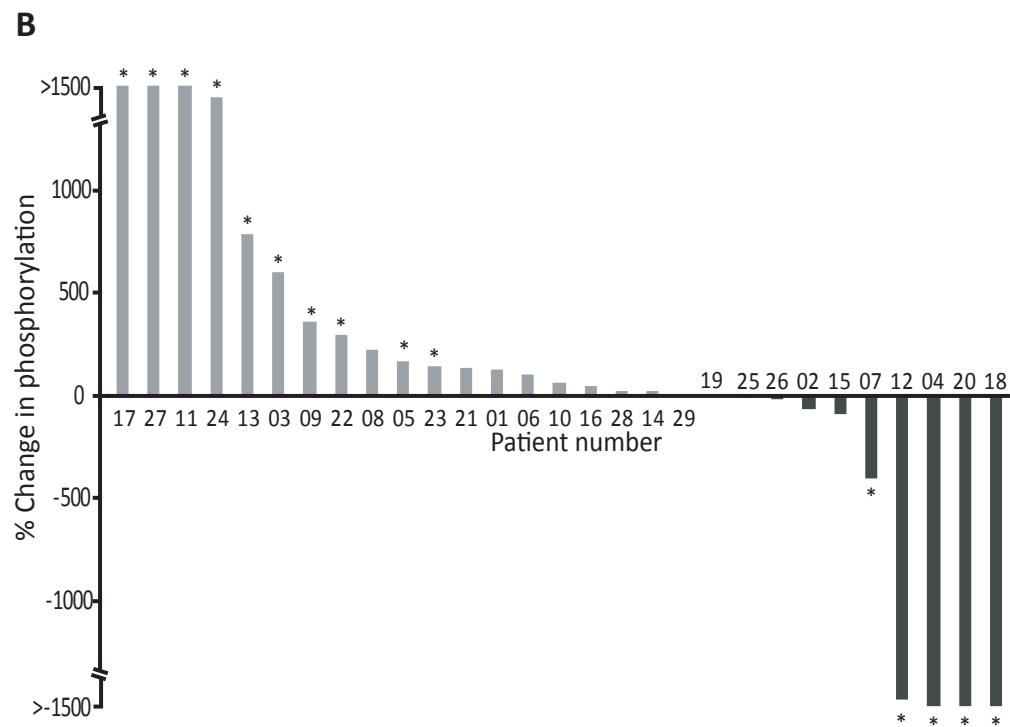

Supplement: bjc2011132x2.pdf [file bjc2011132x2.pdf]
